# Supplementary material
Source: PubMed Central journal article supplement (PMC6335110)
Supplement: djy082_supp.pdf [file djy082_supp.pdf]

**Supplementary Table 1.** Distributions of Examined Variables Among Controls by Study.

| Variable                                                        | PLCO (n=101)             | ATBC (n=124)              | CPSII (n=34)           | P-value* |
|-----------------------------------------------------------------|--------------------------|---------------------------|------------------------|----------|
| Mean age at baseline, y (SD)                                    | 63.0 (4.6)               | 58.0 (5.0)                | 71.0 (5.5)             | <0.001   |
| Caucasian race, n (%)                                           | 98 (97.0)                | 124 (100.0)               | 34 (100.0)             | 0.09     |
| Mean body mass index (kg/m <sup>2</sup> ), n (%)                |                          |                           |                        |          |
| 18.5–<25                                                        | 22 (21.8)                | 63 (50.8)                 | 10 (29.4)              |          |
| 25–<30                                                          | 54 (53.5)                | 51 (41.1)                 | 18 (52.9)              |          |
| ≥30                                                             | 23 (22.8)                | 10 (8.1)                  | 4 (11.8)               |          |
| Missing                                                         | 2 (2.0)                  | 0                         | 2 (5.9)                | <0.001   |
| Smoking Status, n (%)                                           |                          |                           |                        |          |
| Never                                                           | 44 (43.6)                | 0                         | 10 (29.4)              |          |
| Current                                                         | 8 (7.9)                  | 124 (100.0)               | 2 (5.9)                |          |
| Former                                                          | 49 (48.5)                | 0                         | 22 (64.7)              | <0.0001  |
| Cigarettes/day, n (SD)                                          | 25.0 (12.8)              | 20.0 (9.0)                | 15.0 (7.1)             | 0.54     |
| History of diabetes, n (%)                                      | 5 (5.0)                  | 7 (5.6)                   | 8 (23.5)               | <0.001   |
| Education, n (%)                                                |                          |                           |                        |          |
| Less than high school                                           | 8 (7.9)                  | 36 (29.0)                 | 1 (2.9)                |          |
| High school or GED                                              | 17 (16.8)                | 0                         | 3 (8.8)                |          |
| Some college/technical                                          | 36 (35.6)                | 82 (66.1)                 | 10 (29.4)              |          |
| College graduate                                                | 40 (39.6)                | 6 (4.8)                   | 19 (55.9)              |          |
| Missing                                                         | 0                        | 0                         | 1 (2.9)                | <0.001   |
| Hormone Concentrations, age-adjusted mean (95% CI) <sup>†</sup> |                          |                           |                        |          |
| DHEA (nmol/L)                                                   | 5.49 (3.87–7.79)         | 11.05 (7.59–16.11)        | 2.44 (1.60–3.70)       | <0.001   |
| Androstenedione (nmol/L)                                        | 2.73 (2.46–3.03)         | 4.70 (4.20–5.25)          | 1.93 (1.71–2.18)       | <0.001   |
| Testosterone (nmol/L)                                           | 14.49 (14.18–14.81)      | 20.32 (19.85–20.80)       | 10.69 (10.41–10.97)    | <0.001   |
| DHT (pmol/L)                                                    | 1070.43 (972.87–1177.76) | 1502.83 (1355.76–1665.86) | 799.54 (712.94–896.65) | <0.001   |
| Estrone (pmol/L)                                                | 124.15 (114.12–135.05)   | 137.34 (125.43–150.39)    | 80.83 (73.07–89.42)    | <0.001   |
| Estradiol (pmol/L)                                              | 89.15 (84.41–94.15)      | 81.22 (76.58–86.14)       | 62.81 (58.83–67.06)    | <0.001   |
| SHBG (nmol/L)                                                   | 46.96 (39.93–55.24)      | 66.94 (56.20–79.74)       | 47.29 (38.92–57.46)    | <0.001   |
| Parent estrogens (pmol/L)                                       | 216.18 (202.08–231.27)   | 220.65 (205.18–237.29)    | 147.41 (135.95–159.83) | <0.001   |
| Testosterone: Parent estrogens ratio                            | 66.87 (62.64–71.38)      | 92.08 (85.82–98.79)       | 85.73 (79.27–92.72)    | <0.001   |
| Androstenedione: Estrone ratio                                  | 21.94 (18.07–26.64)      | 34.21 (27.75–42.18)       | 25.02 (19.82–31.59)    | <0.001   |
| Testosterone: Estradiol ratio                                   | 162.16 (154.49–170.20)   | 250.15 (237.43–263.55)    | 192.33 (181.48–203.84) | <0.001   |
| Free testosterone (nmol/L)                                      | 0.23 (0.20–0.27)         | 0.26 (0.23–0.30)          | 0.17 (0.14–0.20)       | <0.001   |
| Free DHT (pmol/L)                                               | 19.25 (18.57–19.96)      | 21.77 (20.93–22.63)       | 13.88 (13.29–14.50)    | <0.001   |
| Free estradiol (pmol/L)                                         | 2.08 (2.07–2.09)         | 1.65 (1.64–1.65)          | 1.47 (1.46–1.48)       | <0.001   |

\*Calculated using the Kruskal Wallis test, Chi-Square/Fishers Exact test, and ANOVA test, as applicable. All p-values are from two-sided statistical tests. PLCO: Prostate, Lung, Colorectal, and Ovarian Cancer Screening Trial; ATBC: Alpha-Tocopherol, Beta-Carotene (ATBC) Cancer Prevention Study; CPSII: Cancer Prevention Study II Nutrition Cohort; DHEA: dehydroepiandrosterone; DHT: dihydrotestosterone; SHBG: sex hormone binding globulin.

<sup>†</sup>Standardized to 61 years, mean age among controls.

**Supplementary Table 2.** Adjusted\* odds ratios and 95% confidence intervals for associations between study-specific quartiles of circulating sex steroid hormone concentrations and esophageal and gastric cardia adenocarcinoma risk.

| Hormone                  | Control (n) | Case (n) | OR       | 95% CI       | P-value |
|--------------------------|-------------|----------|----------|--------------|---------|
| DHEA, nmol/L             |             |          |          |              |         |
| Quartile 1               | 63          | 98       | Referent |              |         |
| Quartile 2               | 63          | 64       | 0.68     | (0.40, 1.15) |         |
| Quartile 3               | 61          | 49       | 0.50     | (0.29, 0.88) |         |
| Quartile 4               | 63          | 39       | 0.38     | (0.21, 0.70) |         |
| Continuous†              | 250         | 250      | 0.73     | (0.60, 0.88) | 0.001   |
| Androstenedione, nmol/L  |             |          |          |              |         |
| Quartile 1               | 65          | 93       | Referent |              |         |
| Quartile 2               | 61          | 56       | 0.71     | (0.42, 1.21) |         |
| Quartile 3               | 62          | 50       | 0.63     | (0.35, 1.11) |         |
| Quartile 4               | 63          | 52       | 0.63     | (0.36, 1.10) |         |
| Continuous†              | 251         | 251      | 0.86     | (0.72, 1.03) | 0.09    |
| Testosterone, nmol/L     |             |          |          |              |         |
| Quartile 1               | 64          | 84       | Referent |              |         |
| Quartile 2               | 63          | 63       | 0.95     | (0.56, 1.60) |         |
| Quartile 3               | 61          | 56       | 0.85     | (0.49, 1.47) |         |
| Quartile 4               | 63          | 48       | 0.76     | (0.44, 1.29) |         |
| Continuous†              | 251         | 251      | 0.91     | (0.77, 1.08) | 0.28    |
| DHT, pmol/L              |             |          |          |              |         |
| Quartile 1               | 63          | 84       | Referent |              |         |
| Quartile 2               | 61          | 60       | 0.93     | (0.54, 1.59) |         |
| Quartile 3               | 62          | 52       | 0.85     | (0.49, 1.48) |         |
| Quartile 4               | 63          | 53       | 0.82     | (0.47, 1.44) |         |
| Continuous†              | 249         | 249      | 0.94     | (0.78, 1.12) | 0.46    |
| Estrone, pmol/L          |             |          |          |              |         |
| Quartile 1               | 61          | 72       | Referent |              |         |
| Quartile 2               | 61          | 63       | 0.75     | (0.44, 1.28) |         |
| Quartile 3               | 63          | 50       | 0.61     | (0.33, 1.11) |         |
| Quartile 4               | 62          | 62       | 0.67     | (0.39, 1.16) |         |
| Continuous†              | 247         | 247      | 0.87     | (0.73, 1.04) | 0.13    |
| Estradiol, pmol/L        |             |          |          |              |         |
| Quartile 1               | 61          | 78       | Referent |              |         |
| Quartile 2               | 63          | 64       | 0.85     | (0.49, 1.47) |         |
| Quartile 3               | 62          | 53       | 0.64     | (0.37, 1.11) |         |
| Quartile 4               | 65          | 56       | 0.62     | (0.35, 1.09) |         |
| Continuous†              | 251         | 251      | 0.84     | (0.71, 1.00) | 0.05    |
| SHBG, nmol/L             |             |          |          |              |         |
| Quartile 1               | 64          | 79       | Referent |              |         |
| Quartile 2               | 63          | 47       | 0.57     | (0.32, 1.04) |         |
| Quartile 3               | 62          | 69       | 1.02     | (0.62, 1.70) |         |
| Quartile 4               | 64          | 58       | 0.85     | (0.47, 1.53) |         |
| Continuous†              | 253         | 253      | 1.00     | (0.83, 1.20) | 0.97    |
| Parent estrogens, pmol/L |             |          |          |              |         |
| Quartile 1               | 62          | 73       | Referent |              |         |
| Quartile 2               | 59          | 73       | 0.99     | (0.58, 1.68) |         |
| Quartile 3               | 64          | 34       | 0.36     | (0.19, 0.69) |         |

|                                      |     |     |          |              |      |
|--------------------------------------|-----|-----|----------|--------------|------|
| Quartile 4                           | 62  | 67  | 0.75     | (0.43, 1.30) |      |
| Continuous†                          | 247 | 247 | 0.86     | (0.72, 1.02) | 0.09 |
| Testosterone: Parent estrogens ratio |     |     |          |              |      |
| Quartile 1                           | 63  | 63  | Referent |              |      |
| Quartile 2                           | 61  | 71  | 1.39     | (0.83, 2.33) |      |
| Quartile 3                           | 61  | 55  | 1.13     | (0.63, 2.01) |      |
| Quartile 4                           | 60  | 56  | 1.35     | (0.75, 2.43) |      |
| Continuous†                          | 245 | 245 | 1.07     | (0.89, 1.29) | 0.45 |
| Androstenedione: Estrone ratio       |     |     |          |              |      |
| Quartile 1                           | 61  | 55  | Referent |              |      |
| Quartile 2                           | 63  | 86  | 1.86     | (1.08, 3.20) |      |
| Quartile 3                           | 60  | 60  | 1.32     | (0.75, 2.32) |      |
| Quartile 4                           | 62  | 45  | 1.00     | (0.53, 1.90) |      |
| Continuous†                          | 246 | 246 | 0.96     | (0.79, 1.17) | 0.71 |
| Testosterone: Estradiol ratio        |     |     |          |              |      |
| Quartile 1                           | 64  | 61  | Referent |              |      |
| Quartile 2                           | 63  | 79  | 1.54     | (0.90, 2.62) |      |
| Quartile 3                           | 61  | 63  | 1.41     | (0.80, 2.49) |      |
| Quartile 4                           | 61  | 46  | 1.01     | (0.54, 1.87) |      |
| Continuous†                          | 249 | 249 | 1.00     | (0.82, 1.21) | 0.99 |
| Free testosterone, nmol/L            |     |     |          |              |      |
| Quartile 1                           | 66  | 84  | Referent |              |      |
| Quartile 2                           | 61  | 58  | 0.79     | (0.47, 1.32) |      |
| Quartile 3                           | 62  | 67  | 1.04     | (0.61, 1.76) |      |
| Quartile 4                           | 62  | 42  | 0.60     | (0.34, 1.07) |      |
| Continuous†                          | 251 | 251 | 0.89     | (0.75, 1.06) | 0.21 |
| Free DHT, pmol/L                     |     |     |          |              |      |
| Quartile 1                           | 64  | 87  | Referent |              |      |
| Quartile 2                           | 59  | 53  | 0.72     | (0.42, 1.25) |      |
| Quartile 3                           | 63  | 47  | 0.65     | (0.38, 1.11) |      |
| Quartile 4                           | 63  | 62  | 0.92     | (0.54, 1.56) |      |
| Continuous†                          | 249 | 249 | 0.96     | (0.81, 1.14) | 0.64 |
| Free estradiol, pmol/L               |     |     |          |              |      |
| Quartile 1                           | 62  | 82  | Referent |              |      |
| Quartile 2                           | 61  | 57  | 0.62     | (0.35, 1.08) |      |
| Quartile 3                           | 64  | 61  | 0.61     | (0.35, 1.07) |      |
| Quartile 4                           | 64  | 51  | 0.45     | (0.25, 0.81) |      |
| Continuous†                          | 251 | 251 | 0.79     | (0.65, 0.95) | 0.01 |

\*Conditional logistic regression models were conditioned on matching factors (study, age, race/ethnicity, year of blood draw, and time of blood draw) and adjusted for age (continuous), education (less than high school, high school/GED, some college/technical, college graduate), smoking status (never, current, former), number of cigarettes per day (continuous), body mass index (BMI, 18.5–25.0, 25.0–29.9, ≥30.0 kg/m<sup>2</sup>), and diabetes (yes, no). OR: odds ratio; CI: confidence interval; DHEA: dehydroepiandrosterone; DHT: dihydrotestosterone; SHBG: sex hormone binding globulin.

†Tests of linear trend were performed based on the quartile-specific score of the hormone concentrations. All p-values are from two-sided statistical tests.

**Supplementary Table 3.** Minimally adjusted\* odds ratios and 95% confidence intervals for associations between circulating sex steroid hormone concentrations and esophageal and gastric cardia adenocarcinoma risk.

| Hormone                                  | Control (n) | Case (n) | OR       | 95% CI       |
|------------------------------------------|-------------|----------|----------|--------------|
| DHEA, nmol/L                             |             |          |          |              |
| <4.02                                    | 63          | 84       | Referent |              |
| 4.02 to < 7.36                           | 65          | 73       | 0.67     | (0.40, 1.12) |
| 7.36 to < 12.26                          | 65          | 59       | 0.41     | (0.22, 0.77) |
| ≥12.26                                   | 63          | 40       | 0.25     | (0.12, 0.52) |
| P-trend†                                 |             |          |          | <0.001       |
| Continuous (log <sub>2</sub> ), per unit | 256         | 256      | 0.61     | (0.48, 0.78) |
| Androstenedione, nmol/L                  |             |          |          |              |
| <2.40                                    | 65          | 78       | Referent |              |
| 2.40 to < 3.32                           | 63          | 42       | 0.52     | (0.30, 0.91) |
| 3.32 to < 5.09                           | 64          | 84       | 1.00     | (0.56, 1.77) |
| ≥5.09                                    | 65          | 53       | 0.59     | (0.31, 1.14) |
| P-trend†                                 |             |          |          | 0.69         |
| Continuous (log <sub>2</sub> ), per unit | 257         | 257      | 0.76     | (0.54, 1.06) |
| Testosterone, nmol/L                     |             |          |          |              |
| <12.65                                   | 65          | 80       | Referent |              |
| 12.65 to < 16.70                         | 64          | 60       | 0.74     | (0.46, 1.20) |
| 16.70 to < 23.11                         | 64          | 70       | 0.84     | (0.51, 1.39) |
| ≥23.11                                   | 64          | 47       | 0.52     | (0.29, 0.92) |
| P-trend†                                 |             |          |          | 0.05         |
| Continuous (log <sub>2</sub> ), per unit | 257         | 257      | 0.86     | (0.68, 1.09) |
| DHT, pmol/L                              |             |          |          |              |
| <923.19                                  | 65          | 80       | Referent |              |
| 923.19 to < 1290.17                      | 63          | 70       | 0.88     | (0.55, 1.41) |
| 1290.17 to < 1743.03                     | 63          | 47       | 0.52     | (0.30, 0.91) |
| ≥1743.03                                 | 64          | 58       | 0.63     | (0.37, 1.10) |
| P-trend†                                 |             |          |          | 0.05         |
| Continuous (log <sub>2</sub> ), per unit | 255         | 255      | 0.83     | (0.65, 1.06) |
| Estrone, pmol/L                          |             |          |          |              |
| <98.37                                   | 63          | 73       | Referent |              |
| 98.37 to < 124.80                        | 62          | 63       | 0.85     | (0.50, 1.44) |
| 124.80 to < 158.98                       | 65          | 52       | 0.66     | (0.39, 1.13) |
| ≥158.98                                  | 63          | 65       | 0.84     | (0.49, 1.44) |
| P-trend†                                 |             |          |          | 0.45         |
| Continuous (log <sub>2</sub> ), per unit | 253         | 253      | 0.91     | (0.65, 1.27) |
| Estradiol, pmol/L                        |             |          |          |              |
| <63.87                                   | 64          | 74       | Referent |              |
| 63.87 to < 80.90                         | 65          | 66       | 0.85     | (0.50, 1.43) |
| 80.90 to < 103.15                        | 63          | 68       | 0.91     | (0.54, 1.52) |
| ≥103.15                                  | 65          | 49       | 0.63     | (0.37, 1.07) |
| P-trend†                                 |             |          |          | 0.14         |

|                                          |     |     |          |              |
|------------------------------------------|-----|-----|----------|--------------|
| Continuous (log <sub>2</sub> ), per unit | 257 | 257 | 0.70     | (0.49, 1.00) |
| SHBG, nmol/L                             |     |     |          |              |
| <40.93                                   | 64  | 74  | Referent |              |
| 40.93 to < 57.92                         | 65  | 66  | 1.08     | (0.66, 1.76) |
| 57.92 to < 73.87                         | 63  | 68  | 0.57     | (0.32, 1.01) |
| ≥73.87                                   | 65  | 49  | 0.96     | (0.55, 1.65) |
| P-trend†                                 |     |     |          | 0.45         |
| Continuous (log <sub>2</sub> ), per unit | 257 | 257 | 0.83     | (0.62, 1.11) |
| Parent estrogens, pmol/L                 |     |     |          |              |
| <168.83                                  | 62  | 73  | Referent |              |
| 168.83 to < 208.17                       | 65  | 71  | 0.93     | (0.54, 1.59) |
| 208.17 to < 259.10                       | 63  | 46  | 0.59     | (0.34, 1.02) |
| ≥259.10                                  | 63  | 63  | 0.80     | (0.47, 1.37) |
| P-trend†                                 |     |     |          | 0.24         |
| Continuous (log <sub>2</sub> ), per unit | 253 | 253 | 0.80     | (0.55, 1.15) |
| Testosterone: Parent estrogens ratio     |     |     |          |              |
| <58.40                                   | 64  | 58  | Referent |              |
| 58.40 to < 85.33                         | 62  | 86  | 1.54     | (0.93, 2.57) |
| 85.33 to < 115.56                        | 63  | 61  | 1.03     | (0.62, 1.72) |
| ≥115.56                                  | 62  | 46  | 0.77     | (0.43, 1.38) |
| P-trend†                                 |     |     |          | 0.17         |
| Continuous (log <sub>2</sub> ), per unit | 251 | 251 | 0.90     | (0.70, 1.15) |
| Androstenedione: Estrone ratio           |     |     |          |              |
| <20.62                                   | 61  | 65  | Referent |              |
| 20.62 to < 27.32                         | 64  | 59  | 0.85     | (0.51, 1.44) |
| 27.32 to < 38.10                         | 64  | 68  | 0.98     | (0.57, 1.71) |
| ≥38.10                                   | 63  | 60  | 0.88     | (0.50, 1.56) |
| P-trend†                                 |     |     |          | 0.78         |
| Continuous (log <sub>2</sub> ), per unit | 252 | 252 | 0.86     | (0.64, 1.16) |
| Testosterone: Estradiol ratio            |     |     |          |              |
| <153.02                                  | 65  | 63  | Referent |              |
| 153.02 to < 204.60                       | 64  | 65  | 1.01     | (0.61, 1.67) |
| 204.60 to < 289.04                       | 62  | 81  | 1.26     | (0.77, 2.06) |
| ≥289.04                                  | 64  | 46  | 0.70     | (0.39, 1.26) |
| P-trend†                                 |     |     |          | 0.45         |
| Continuous (log <sub>2</sub> ), per unit | 255 | 255 | 0.97     | (0.74, 1.27) |
| Free testosterone, nmol/L                |     |     |          |              |
| <0.20                                    | 64  | 81  | Referent |              |
| 0.20 to < to 0.24                        | 66  | 66  | 0.76     | (0.47, 1.24) |
| 0.24 to < 0.30                           | 63  | 60  | 0.71     | (0.43, 1.17) |
| ≥0.30                                    | 64  | 50  | 0.56     | (0.32, 0.97) |
| P-trend†                                 |     |     |          | 0.04         |
| Continuous (log <sub>2</sub> ), per unit | 257 | 257 | 0.89     | (0.68, 1.17) |
| Free DHT, pmol/L                         |     |     |          |              |

|                                          |     |     |          |              |
|------------------------------------------|-----|-----|----------|--------------|
| <16.12                                   | 65  | 88  | Referent |              |
| 16.12 to < 20.37                         | 63  | 49  | 0.54     | (0.33, 0.91) |
| 20.37 to < 25.53                         | 63  | 50  | 0.52     | (0.30, 0.90) |
| ≥25.53                                   | 64  | 68  | 0.76     | (0.46, 1.26) |
| P-trend†                                 |     |     |          | 0.30         |
| Continuous (log <sub>2</sub> ), per unit | 255 | 255 | 0.94     | (0.74, 1.19) |
| Free estradiol, pmol/L                   |     |     |          |              |
| <1.43                                    | 65  | 67  | Referent |              |
| 1.43 to < 1.74                           | 63  | 72  | 1.10     | (0.66, 1.84) |
| 1.74 to < 2.23                           | 64  | 71  | 1.06     | (0.64, 1.75) |
| ≥2.23                                    | 65  | 47  | 0.69     | (0.40, 1.19) |
| P-trend†                                 |     |     |          | 0.14         |
| Continuous (log <sub>2</sub> ), per unit | 257 | 257 | 0.76     | (0.53, 1.09) |

\*Conditional logistic regression models were conditioned on matching factors (study, age, race/ethnicity, year of blood draw, and time of blood draw). OR: odds ratio; CI: confidence interval; DHEA: dehydroepiandrosterone; DHT: dihydrotestosterone; SHBG: sex hormone binding globulin.

†Tests of linear trend were performed based on the quartile-specific medians of the hormone concentrations. All p-values are from two-sided statistical tests.

**Supplementary Table 4.** Adjusted\* odds ratios and 95% confidence intervals for associations between circulating sex steroid hormone concentrations and esophageal and gastric cardia adenocarcinoma risk, stratified by time between blood draw and cancer diagnosis.

| Hormone                        | <8.42 Years |          |          |              | ≥8.42 Years |          |          |              |
|--------------------------------|-------------|----------|----------|--------------|-------------|----------|----------|--------------|
|                                | Control (n) | Case (n) | OR       | 95% CI       | Control (n) | Case (n) | OR       | 95% CI       |
| DHEA, nmol/L                   |             |          |          |              |             |          |          |              |
| <4.02                          | 41          | 48       | Referent |              | 19          | 31       | Referent |              |
| 4.02 to < 7.36                 | 28          | 34       | 0.89     | (0.39, 2.00) | 35          | 39       | 0.76     | (0.31, 1.84) |
| 7.36 to < 12.26                | 24          | 24       | 0.71     | (0.26, 1.92) | 40          | 34       | 0.39     | (0.14, 1.10) |
| ≥12.26                         | 24          | 11       | 0.32     | (0.09, 1.09) | 39          | 29       | 0.27     | (0.08, 0.86) |
| P-trend†                       |             |          |          | 0.07         |             |          |          | 0.02         |
| Continuous (log <sub>2</sub> ) | 117         | 117      | 0.78     | (0.53, 1.15) | 133         | 133      | 0.51     | (0.33, 0.79) |
| Androstenedione, nmol/L        |             |          |          |              |             |          |          |              |
| <2.40                          | 36          | 43       | Referent |              | 26          | 30       | Referent |              |
| 2.40 to < 3.32                 | 33          | 22       | 0.55     | (0.23, 1.36) | 27          | 20       | 0.53     | (0.20, 1.42) |
| 3.32 to < 5.09                 | 26          | 34       | 1.21     | (0.43, 3.38) | 38          | 49       | 1.20     | (0.47, 3.07) |
| ≥5.09                          | 24          | 20       | 0.73     | (0.24, 2.19) | 41          | 33       | 0.78     | (0.27, 2.29) |
| P-trend†                       |             |          |          | 0.79         |             |          |          | 0.82         |
| Continuous (log <sub>2</sub> ) | 119         | 119      | 0.94     | (0.56, 1.57) | 132         | 132      | 0.84     | (0.45, 1.54) |
| Testosterone, nmol/L           |             |          |          |              |             |          |          |              |
| <12.65                         | 31          | 46       | Referent |              | 31          | 32       | Referent |              |
| 12.65 to < 16.70               | 35          | 23       | 0.35     | (0.14, 0.84) | 27          | 35       | 1.65     | (0.73, 3.75) |
| 16.70 to < 23.11               | 30          | 31       | 0.69     | (0.31, 1.57) | 33          | 37       | 1.97     | (0.80, 4.89) |
| ≥23.11                         | 22          | 18       | 0.43     | (0.16, 1.15) | 42          | 29       | 1.15     | (0.43, 3.08) |
| P-trend†                       |             |          |          | 0.26         |             |          |          | 0.95         |
| Continuous (log <sub>2</sub> ) | 118         | 118      | 0.91     | (0.64, 1.27) | 133         | 133      | 1.05     | (0.70, 1.57) |
| DHT, pmol/L                    |             |          |          |              |             |          |          |              |
| <923.19                        | 32          | 43       | Referent |              | 30          | 35       | Referent |              |
| 923.19 to < 1290.17            | 29          | 32       | 0.91     | (0.43, 1.95) | 32          | 35       | 1.72     | (0.74, 4.02) |
| 1290.17 to < 1743.03           | 31          | 22       | 0.48     | (0.20, 1.19) | 32          | 24       | 1.26     | (0.46, 3.45) |
| ≥1743.03                       | 25          | 20       | 0.48     | (0.18, 1.25) | 38          | 38       | 2.01     | (0.77, 5.24) |
| P-trend†                       |             |          |          | 0.08         |             |          |          | 0.25         |
| Continuous (log <sub>2</sub> ) | 117         | 117      | 0.67     | (0.43, 1.04) | 132         | 132      | 1.44     | (0.93, 2.23) |
| Estrone, pmol/L                |             |          |          |              |             |          |          |              |
| <98.37                         | 31          | 36       | Referent |              | 27          | 33       | Referent |              |
| 98.37 to < 124.80              | 30          | 27       | 0.96     | (0.38, 2.41) | 31          | 35       | 0.75     | (0.33, 1.74) |
| 124.80 to < 158.98             | 28          | 19       | 0.60     | (0.25, 1.43) | 37          | 33       | 0.61     | (0.26, 1.43) |
| ≥158.98                        | 25          | 32       | 0.84     | (0.34, 2.06) | 38          | 32       | 0.58     | (0.25, 1.33) |
| P-trend†                       |             |          |          | 0.53         |             |          |          | 0.18         |
| Continuous (log <sub>2</sub> ) | 114         | 114      | 0.84     | (0.46, 1.51) | 133         | 133      | 0.81     | (0.50, 1.34) |
| Estradiol, pmol/L              |             |          |          |              |             |          |          |              |
| <63.87                         | 31          | 38       | Referent |              | 28          | 33       | Referent |              |
| 63.87 to < 80.90               | 34          | 23       | 0.54     | (0.21, 1.36) | 31          | 42       | 1.41     | (0.63, 3.17) |

|                                      |     |     |          |              |     |     |          |              |
|--------------------------------------|-----|-----|----------|--------------|-----|-----|----------|--------------|
| 80.90 to < 103.15                    | 28  | 31  | 0.76     | (0.32, 1.79) | 35  | 37  | 1.09     | (0.48, 2.49) |
| ≥103.15                              | 25  | 26  | 0.54     | (0.21, 1.38) | 39  | 21  | 0.59     | (0.26, 1.35) |
| P-trend†                             |     |     | 0.40     |              |     |     | 0.10     |              |
| Continuous (log <sub>2</sub> )       | 118 | 118 | 0.52     | (0.26, 1.05) | 133 | 133 | 0.77     | (0.46, 1.29) |
| SHBG, nmol/L                         |     |     |          |              |     |     |          |              |
| <40.93                               | 33  | 36  | Referent |              | 29  | 32  | Referent |              |
| 40.93 to < 57.92                     | 29  | 34  | 0.91     | (0.40, 2.06) | 36  | 42  | 1.16     | (0.53, 2.52) |
| 57.92 to < 73.87                     | 26  | 16  | 0.51     | (0.19, 1.35) | 36  | 27  | 0.94     | (0.36, 2.44) |
| ≥73.87                               | 32  | 34  | 0.93     | (0.37, 2.37) | 32  | 32  | 1.51     | (0.59, 3.86) |
| P-trend†                             |     |     | 0.74     |              |     |     | 0.44     |              |
| Continuous (log <sub>2</sub> )       | 120 | 120 | 0.68     | (0.40, 1.15) | 133 | 133 | 1.35     | (0.82, 2.22) |
| Parent estrogens, pmol/L             |     |     |          |              |     |     |          |              |
| <168.83                              | 29  | 40  | Referent |              | 28  | 29  | Referent |              |
| 168.83 to < 208.17                   | 34  | 25  | 0.50     | (0.20, 1.25) | 31  | 45  | 1.20     | (0.50, 2.86) |
| 208.17 to < 259.10                   | 27  | 16  | 0.42     | (0.17, 1.05) | 35  | 30  | 0.66     | (0.29, 1.52) |
| ≥259.10                              | 24  | 33  | 0.68     | (0.27, 1.74) | 39  | 29  | 0.67     | (0.29, 1.53) |
| P-trend†                             |     |     | 0.41     |              |     |     | 0.12     |              |
| Continuous (log <sub>2</sub> )       | 114 | 114 | 0.68     | (0.34, 1.33) | 133 | 133 | 0.79     | (0.46, 1.36) |
| Testosterone: Parent estrogens ratio |     |     |          |              |     |     |          |              |
| <58.40                               | 27  | 29  | Referent |              | 37  | 29  | Referent |              |
| 58.40 to < 85.33                     | 33  | 42  | 1.36     | (0.57, 3.23) | 27  | 42  | 2.95     | (1.22, 7.12) |
| 85.33 to < 115.56                    | 24  | 27  | 1.22     | (0.52, 2.88) | 36  | 32  | 2.20     | (0.89, 5.45) |
| ≥115.56                              | 28  | 14  | 0.49     | (0.17, 1.41) | 33  | 30  | 2.70     | (0.93, 7.83) |
| P-trend†                             |     |     | 0.14     |              |     |     | 0.13     |              |
| Continuous (log <sub>2</sub> )       | 112 | 112 | 0.96     | (0.63, 1.45) | 133 | 133 | 1.17     | (0.80, 1.70) |
| Androstenedione: Estrone ratio       |     |     |          |              |     |     |          |              |
| <20.62                               | 31  | 37  | Referent |              | 29  | 27  | Referent |              |
| 20.62 to < 27.32                     | 27  | 27  | 0.90     | (0.37, 2.19) | 36  | 28  | 1.14     | (0.45, 2.89) |
| 27.32 to < 38.10                     | 32  | 23  | 0.73     | (0.25, 2.16) | 29  | 45  | 2.84     | (1.07, 7.49) |
| ≥38.10                               | 24  | 27  | 1.15     | (0.40, 3.32) | 38  | 32  | 1.69     | (0.61, 4.67) |
| P-trend†                             |     |     | 0.60     |              |     |     | 0.27     |              |
| Continuous (log <sub>2</sub> )       | 114 | 114 | 1.05     | (0.62, 1.79) | 132 | 132 | 1.09     | (0.68, 1.74) |
| Testosterone: Estradiol ratio        |     |     |          |              |     |     |          |              |
| <153.02                              | 32  | 35  | Referent |              | 33  | 28  | Referent |              |
| 153.02 to < 204.60                   | 28  | 32  | 0.92     | (0.41, 2.10) | 33  | 30  | 1.34     | (0.56, 3.21) |
| 204.60 to < 289.04                   | 32  | 33  | 0.94     | (0.39, 2.24) | 28  | 46  | 2.84     | (1.19, 6.81) |
| ≥289.04                              | 24  | 16  | 0.60     | (0.20, 1.74) | 39  | 29  | 1.65     | (0.60, 4.57) |
| P-trend†                             |     |     | 0.40     |              |     |     | 0.16     |              |
| Continuous (log <sub>2</sub> )       | 116 | 116 | 1.05     | (0.68, 1.63) | 133 | 133 | 1.35     | (0.83, 2.21) |
| Free testosterone, nmol/L            |     |     |          |              |     |     |          |              |
| <0.20                                | 32  | 45  | Referent |              | 30  | 34  | Referent |              |
| 0.20 to < to 0.24                    | 38  | 34  | 0.73     | (0.34, 1.56) | 27  | 31  | 1.03     | (0.43, 2.44) |
| 0.24 to < 0.30                       | 24  | 24  | 0.69     | (0.30, 1.55) | 36  | 33  | 1.09     | (0.49, 2.41) |
| ≥0.30                                | 24  | 15  | 0.43     | (0.17, 1.07) | 40  | 35  | 1.23     | (0.51, 2.95) |



|                                |     |     |          |              |     |     |                   |
|--------------------------------|-----|-----|----------|--------------|-----|-----|-------------------|
| P-trend†                       |     |     | 0.08     |              |     |     | 0.62              |
| Continuous (log <sub>2</sub> ) | 118 | 118 | 0.99     | (0.68, 1.44) | 133 | 133 | 0.91 (0.58, 1.43) |
| Free DHT, pmol/L               |     |     |          |              |     |     |                   |
| <16.12                         | 29  | 50  | Referent |              | 33  | 35  | Referent          |
| 16.12 to < 20.37               | 33  | 24  | 0.47     | (0.22, 1.02) | 28  | 24  | 1.08 (0.41, 2.83) |
| 20.37 to < 25.53               | 30  | 20  | 0.40     | (0.17, 0.95) | 33  | 29  | 1.30 (0.52, 3.27) |
| ≥25.53                         | 25  | 23  | 0.57     | (0.25, 1.29) | 38  | 44  | 2.30 (0.95, 5.55) |
| P-trend†                       |     |     | 0.13     |              |     |     | 0.04              |
| Continuous (log <sub>2</sub> ) | 117 | 117 | 0.97     | (0.72, 1.32) | 132 | 132 | 1.39 (0.81, 2.37) |
| Free estradiol, pmol/L         |     |     |          |              |     |     |                   |
| <1.43                          | 31  | 31  | Referent |              | 30  | 34  | Referent          |
| 1.43 to < 1.74                 | 33  | 31  | 0.90     | (0.36, 2.25) | 30  | 40  | 1.12 (0.48, 2.58) |
| 1.74 to < 2.23                 | 28  | 34  | 1.07     | (0.43, 2.67) | 35  | 35  | 0.79 (0.36, 1.73) |
| ≥2.23                          | 26  | 22  | 0.57     | (0.21, 1.57) | 38  | 24  | 0.53 (0.22, 1.25) |
| P-trend†                       |     |     | 0.31     |              |     |     | 0.07              |
| Continuous (log <sub>2</sub> ) | 118 | 118 | 0.63     | (0.30, 1.29) | 133 | 133 | 0.66 (0.38, 1.14) |

\*Conditional logistic regression models were conditioned on matching factors (study, age, race/ethnicity, year of blood draw, and time of blood draw) and adjusted for age (continuous), education (less than high school, high school/GED, some college/technical, college graduate), smoking status (never, current, former), number of cigarettes per day (continuous), body mass index (BMI, 18.5–25.0, 25.0–29.9, ≥30.0 kg/m<sup>2</sup>), and diabetes (yes, no). OR: odds ratio; CI: confidence interval; DHEA: dehydroepiandrosterone; DHT: dihydrotestosterone; SHBG: sex hormone binding globulin.

†Tests of linear trend were performed based on the quartile-specific medians of the hormone concentrations. All p-values are from two-sided statistical tests.

**Supplementary Table 5.** Adjusted\* odds ratio and 95% confidence intervals for associations between circulating sex steroid hormone concentrations and esophageal and gastric cardia adenocarcinoma risk, stratified by cancer site.

| Hormone                        | Combined EA/GCA |          |          |              | Esophageal Adenocarcinoma |          |              | Gastric Cardia Adenocarcinoma |          |              | Ratio of the Odds Ratios |              |
|--------------------------------|-----------------|----------|----------|--------------|---------------------------|----------|--------------|-------------------------------|----------|--------------|--------------------------|--------------|
|                                | Control (n)     | Case (n) | OR       | 95% CI       | Case (n)                  | OR       | 95% CI       | Case (n)                      | OR       | 95% CI       | ROR                      | 95% CI       |
| DHEA, nmol/L                   |                 |          |          |              |                           |          |              |                               |          |              |                          |              |
| <4.02                          | 69              | 83       | Referent |              | 46                        | Referent |              | 37                            | Referent |              | Referent                 |              |
| 4.02 to < 7.36                 | 67              | 73       | 0.95     | (0.54, 1.70) | 30                        | 0.91     | (0.46, 1.81) | 43                            | 0.95     | (0.48, 1.90) | 0.96                     | (0.45, 2.02) |
| 7.36 to < 12.26                | 64              | 59       | 0.60     | (0.30, 1.19) | 18                        | 0.73     | (0.30, 1.77) | 41                            | 0.53     | (0.24, 1.18) | 1.39                     | (0.53, 3.61) |
| ≥12.26                         | 65              | 40       | 0.37     | (0.18, 0.78) | 10                        | 0.45     | (0.16, 1.26) | 30                            | 0.34     | (0.14, 0.81) | 1.31                     | (0.43, 4.01) |
| P-trend†                       |                 |          |          | 0.003        |                           |          | 0.11         |                               |          | 0.004        |                          | 0.49         |
| Continuous (log <sub>2</sub> ) | 265             | 255      | 0.68     | (0.52, 0.88) | 104                       | 0.70     | (0.50, 0.99) | 151                           | 0.67     | (0.49, 0.90) | 1.05                     | (0.73, 1.52) |
| Androstenedione, nmol/L        |                 |          |          |              |                           |          |              |                               |          |              |                          |              |
| <2.40                          | 72              | 78       | Referent |              | 45                        | Referent |              | 33                            | Referent |              | Referent                 |              |
| 2.40 to < 3.32                 | 61              | 42       | 0.76     | (0.42, 1.40) | 19                        | 0.67     | (0.32, 1.41) | 23                            | 0.81     | (0.39, 1.69) | 0.83                     | (0.36, 1.93) |
| 3.32 to < 5.09                 | 65              | 84       | 1.66     | (0.85, 3.25) | 31                        | 2.10     | (0.92, 4.79) | 53                            | 1.44     | (0.65, 3.20) | 1.46                     | (0.59, 3.58) |
| ≥5.09                          | 65              | 53       | 1.19     | (0.56, 2.50) | 10                        | 0.90     | (0.32, 2.57) | 43                            | 1.25     | (0.53, 2.95) | 0.72                     | (0.24, 2.20) |
| P-trend†                       |                 |          |          | 0.33         |                           |          | 0.45         |                               |          | 0.39         |                          | 0.97         |
| Continuous (log <sub>2</sub> ) | 263             | 257      | 1.01     | (0.69, 1.50) | 105                       | 0.98     | (0.60, 1.59) | 152                           | 1.04     | (0.66, 1.65) | 0.94                     | (0.55, 1.60) |
| Testosterone, nmol/L           |                 |          |          |              |                           |          |              |                               |          |              |                          |              |
| <12.65                         | 69              | 80       | Referent |              | 43                        | Referent |              | 37                            | Referent |              | Referent                 |              |
| 12.65 to < 16.70               | 65              | 59       | 0.92     | (0.53, 1.61) | 26                        | 1.04     | (0.52, 2.09) | 33                            | 0.86     | (0.44, 1.68) | 1.20                     | (0.56, 2.60) |
| 16.70 to < 23.11               | 64              | 70       | 1.11     | (0.63, 1.95) | 26                        | 1.18     | (0.58, 2.41) | 44                            | 1.10     | (0.57, 2.12) | 1.08                     | (0.50, 2.32) |
| ≥23.11                         | 66              | 47       | 0.75     | (0.40, 1.40) | 10                        | 0.53     | (0.21, 1.31) | 37                            | 0.86     | (0.42, 1.76) | 0.62                     | (0.23, 1.64) |
| P-trend†                       |                 |          |          | 0.47         |                           |          | 0.30         |                               |          | 0.84         |                          | 0.42         |
| Continuous (log <sub>2</sub> ) | 264             | 256      | 0.92     | (0.71, 1.20) | 105                       | 1.03     | (0.73, 1.47) | 151                           | 0.86     | (0.63, 1.16) | 1.21                     | (0.83, 1.76) |
| DHT, pmol/L                    |                 |          |          |              |                           |          |              |                               |          |              |                          |              |
| <923.19                        | 70              | 79       | Referent |              | 46                        | Referent |              | 33                            | Referent |              | Referent                 |              |
| 923.19 to < 1290.17            | 64              | 70       | 1.30     | (0.74, 2.27) | 35                        | 1.42     | (0.73, 2.78) | 35                            | 1.28     | (0.65, 2.51) | 1.11                     | (0.53, 2.34) |
| 1290.17 to < 1743.03           | 64              | 48       | 0.80     | (0.44, 1.45) | 12                        | 0.44     | (0.19, 1.02) | 36                            | 1.19     | (0.60, 2.37) | 0.37                     | (0.15, 0.92) |

|                                      |     |     |          |              |     |          |              |     |          |              |          |              |
|--------------------------------------|-----|-----|----------|--------------|-----|----------|--------------|-----|----------|--------------|----------|--------------|
| ≥1743.03                             | 65  | 58  | 1.00     | (0.54, 1.85) | 12  | 0.58     | (0.24, 1.38) | 46  | 1.43     | (0.71, 2.89) | 0.40     | (0.16, 1.02) |
| P-trend†                             |     |     | 0.62     |              |     | 0.05     |              |     | 0.39     |              | 0.01     |              |
| Continuous (log <sub>2</sub> )       | 263 | 255 | 0.98     | (0.74, 1.29) | 105 | 0.86     | (0.60, 1.22) | 150 | 1.12     | (0.80, 1.56) | 0.76     | (0.51, 1.14) |
| Estrone, pmol/L                      |     |     |          |              |     |          |              |     |          |              |          |              |
| <98.37                               | 68  | 73  | Referent |              | 38  | Referent |              | 35  | Referent |              | Referent |              |
| 98.37 to < 124.80                    | 63  | 65  | 0.80     | (0.46, 1.40) | 24  | 0.66     | (0.32, 1.36) | 41  | 0.90     | (0.48, 1.71) | 0.73     | (0.34, 1.57) |
| 124.80 to < 158.98                   | 66  | 52  | 0.69     | (0.39, 1.21) | 24  | 0.85     | (0.42, 1.74) | 28  | 0.60     | (0.31, 1.19) | 1.42     | (0.64, 3.15) |
| ≥158.98                              | 63  | 65  | 0.82     | (0.47, 1.44) | 17  | 0.56     | (0.26, 1.21) | 48  | 0.97     | (0.51, 1.83) | 0.58     | (0.26, 1.30) |
| P-trend†                             |     |     | 0.46     |              |     | 0.24     |              |     | 0.80     |              | 0.36     |              |
| Continuous (log <sub>2</sub> )       | 260 | 255 | 0.91     | (0.64, 1.30) | 103 | 0.88     | (0.56, 1.39) | 152 | 0.93     | (0.62, 1.40) | 0.94     | (0.58, 1.54) |
| Estradiol, pmol/L                    |     |     |          |              |     |          |              |     |          |              |          |              |
| <63.87                               | 65  | 73  | Referent |              | 29  | Referent |              | 44  | Referent |              | Referent |              |
| 63.87 to < 80.90                     | 67  | 67  | 0.96     | (0.57, 1.62) | 29  | 1.23     | (0.62, 2.47) | 38  | 0.83     | (0.45, 1.51) | 1.49     | (0.71, 3.13) |
| 80.90 to < 103.15                    | 65  | 69  | 1.08     | (0.64, 1.82) | 21  | 0.94     | (0.45, 1.95) | 48  | 1.11     | (0.62, 1.99) | 0.84     | (0.39, 1.81) |
| ≥103.15                              | 65  | 49  | 0.74     | (0.42, 1.30) | 26  | 1.18     | (0.57, 2.44) | 23  | 0.52     | (0.27, 1.02) | 2.25     | (1.00, 5.07) |
| P-trend†                             |     |     | 0.45     |              |     | 0.89     |              |     | 0.20     |              | 0.25     |              |
| Continuous (log <sub>2</sub> )       | 262 | 258 | 0.80     | (0.54, 1.18) | 105 | 0.95     | (0.57, 1.58) | 153 | 0.71     | (0.46, 1.11) | 1.33     | (0.77, 2.30) |
| SHBG, nmol/L                         |     |     |          |              |     |          |              |     |          |              |          |              |
| <40.93                               | 66  | 70  | Referent |              | 35  | Referent |              | 35  | Referent |              | Referent |              |
| 40.93 to < 57.92                     | 68  | 77  | 1.16     | (0.68, 1.97) | 40  | 1.66     | (0.86, 3.19) | 37  | 0.88     | (0.46, 1.66) | 1.90     | (0.92, 3.91) |
| 57.92 to < 73.87                     | 66  | 44  | 0.75     | (0.42, 1.34) | 13  | 0.60     | (0.27, 1.37) | 31  | 0.83     | (0.43, 1.64) | 0.72     | (0.30, 1.76) |
| ≥73.87                               | 65  | 67  | 1.21     | (0.67, 2.16) | 17  | 0.91     | (0.41, 2.01) | 50  | 1.38     | (0.71, 2.70) | 0.66     | (0.29, 1.52) |
| P-trend†                             |     |     | 0.76     |              |     | 0.37     |              |     | 0.24     |              | 0.08     |              |
| Continuous (log <sub>2</sub> )       | 265 | 258 | 0.99     | (0.72, 1.36) | 105 | 0.94     | (0.62, 1.41) | 153 | 1.05     | (0.72, 1.53) | 0.89     | (0.57, 1.40) |
| Parent estrogens, pmol/L             |     |     |          |              |     |          |              |     |          |              |          |              |
| <168.83                              | 66  | 72  | Referent |              | 33  | Referent |              | 39  | Referent |              | Referent |              |
| 168.83 to < 208.17                   | 66  | 74  | 0.95     | (0.55, 1.61) | 31  | 1.06     | (0.53, 2.11) | 43  | 0.89     | (0.48, 1.64) | 1.19     | (0.57, 2.48) |
| 208.17 to < 259.10                   | 65  | 46  | 0.61     | (0.35, 1.08) | 17  | 0.63     | (0.29, 1.34) | 29  | 0.59     | (0.31, 1.13) | 1.07     | (0.46, 2.45) |
| ≥259.10                              | 63  | 63  | 0.83     | (0.47, 1.46) | 22  | 0.86     | (0.40, 1.83) | 41  | 0.80     | (0.43, 1.51) | 1.07     | (0.49, 2.36) |
| P-trend†                             |     |     | 0.27     |              |     | 0.41     |              |     | 0.31     |              | 0.99     |              |
| Continuous (log <sub>2</sub> )       | 260 | 255 | 0.85     | (0.57, 1.27) | 103 | 0.88     | (0.52, 1.48) | 152 | 0.83     | (0.52, 1.31) | 1.06     | (0.61, 1.85) |
| Testosterone: Parent estrogens ratio |     |     |          |              |     |          |              |     |          |              |          |              |
| <58.40                               | 67  | 59  | Referent |              | 29  | Referent |              | 30  | Referent |              | Referent |              |

|                                |     |     |          |              |     |          |              |     |          |              |          |              |
|--------------------------------|-----|-----|----------|--------------|-----|----------|--------------|-----|----------|--------------|----------|--------------|
| 58.40 to < 85.33               | 65  | 87  | 1.83     | (1.05, 3.18) | 35  | 1.53     | (0.75, 3.11) | 52  | 2.05     | (1.08, 3.89) | 0.74     | (0.35, 1.58) |
| 85.33 to < 115.56              | 63  | 61  | 1.40     | (0.79, 2.48) | 25  | 1.50     | (0.71, 3.19) | 36  | 1.36     | (0.69, 2.66) | 1.11     | (0.48, 2.55) |
| ≥115.56                        | 65  | 46  | 1.12     | (0.60, 2.11) | 14  | 0.94     | (0.39, 2.25) | 32  | 1.26     | (0.62, 2.60) | 0.74     | (0.29, 1.92) |
| P-trend†                       |     |     | 0.88     |              |     | 0.88     |              |     | 0.97     |              | 0.91     |              |
| Continuous (log <sub>2</sub> ) | 260 | 253 | 0.97     | (0.73, 1.27) | 103 | 1.04     | (0.73, 1.47) | 150 | 0.92     | (0.67, 1.26) | 1.13     | (0.78, 1.62) |
| Androstenedione: Estrone ratio |     |     |          |              |     |          |              |     |          |              |          |              |
| <20.62                         | 64  | 66  | Referent |              | 35  | Referent |              | 31  | Referent |              | Referent |              |
| 20.62 to < 27.32               | 69  | 59  | 1.25     | (0.71, 2.20) | 23  | 1.15     | (0.56, 2.38) | 36  | 1.30     | (0.66, 2.54) | 0.89     | (0.40, 1.97) |
| 27.32 to < 38.10               | 65  | 69  | 1.59     | (0.87, 2.89) | 28  | 1.85     | (0.87, 3.95) | 41  | 1.44     | (0.71, 2.91) | 1.29     | (0.56, 2.94) |
| ≥38.10                         | 62  | 60  | 1.50     | (0.78, 2.88) | 17  | 1.38     | (0.58, 3.32) | 43  | 1.56     | (0.74, 3.27) | 0.89     | (0.35, 2.25) |
| P-trend†                       |     |     | 0.22     |              |     | 0.34     |              |     | 0.28     |              | 0.97     |              |
| Continuous (log <sub>2</sub> ) | 260 | 254 | 1.09     | (0.78, 1.52) | 103 | 1.05     | (0.69, 1.61) | 151 | 1.11     | (0.75, 1.63) | 0.95     | (0.60, 1.50) |
| Testosterone: Estradiol ratio  |     |     |          |              |     |          |              |     |          |              |          |              |
| <153.02                        | 69  | 63  | Referent |              | 34  | Referent |              | 29  | Referent |              | Referent |              |
| 153.02 to < 204.60             | 64  | 65  | 1.14     | (0.65, 2.01) | 31  | 1.21     | (0.60, 2.46) | 34  | 1.13     | (0.57, 2.23) | 1.07     | (0.49, 2.36) |
| 204.60 to < 289.04             | 64  | 82  | 1.59     | (0.90, 2.81) | 26  | 1.39     | (0.66, 2.92) | 56  | 1.77     | (0.91, 3.43) | 0.79     | (0.35, 1.76) |
| ≥289.04                        | 65  | 46  | 0.96     | (0.50, 1.85) | 14  | 0.94     | (0.38, 2.31) | 32  | 1.02     | (0.48, 2.18) | 0.92     | (0.35, 2.44) |
| P-trend†                       |     |     | 0.81     |              |     | 1.00     |              |     | 0.66     |              | 0.73     |              |
| Continuous (log <sub>2</sub> ) | 262 | 256 | 1.03     | (0.74, 1.44) | 105 | 1.08     | (0.71, 1.63) | 151 | 1.02     | (0.70, 1.50) | 1.05     | (0.69, 1.61) |
| Free testosterone, nmol/L      |     |     |          |              |     |          |              |     |          |              |          |              |
| <0.20                          | 70  | 81  | Referent |              | 41  | Referent |              | 40  | Referent |              | Referent |              |
| 0.20 to < to 0.24              | 66  | 65  | 0.95     | (0.55, 1.64) | 24  | 0.83     | (0.42, 1.67) | 41  | 1.03     | (0.55, 1.92) | 0.81     | (0.39, 1.71) |
| 0.24 to < 0.30                 | 63  | 60  | 0.91     | (0.52, 1.58) | 26  | 1.06     | (0.52, 2.15) | 34  | 0.81     | (0.42, 1.56) | 1.31     | (0.60, 2.85) |
| ≥0.30                          | 65  | 50  | 0.74     | (0.41, 1.34) | 14  | 0.70     | (0.31, 1.59) | 36  | 0.76     | (0.39, 1.49) | 0.92     | (0.38, 2.24) |
| P-trend†                       |     |     | 0.32     |              |     | 0.58     |              |     | 0.31     |              | 0.78     |              |
| Continuous (log <sub>2</sub> ) | 264 | 256 | 0.90     | (0.68, 1.19) | 105 | 1.13     | (0.73, 1.74) | 151 | 0.78     | (0.56, 1.07) | 1.45     | (0.92, 2.30) |
| Free DHT, pmol/L               |     |     |          |              |     |          |              |     |          |              |          |              |
| <16.12                         | 70  | 88  | Referent |              | 46  | Referent |              | 42  | Referent |              | Referent |              |
| 16.12 to < 20.37               | 64  | 49  | 0.72     | (0.41, 1.26) | 21  | 0.70     | (0.35, 1.43) | 28  | 0.77     | (0.40, 1.48) | 0.92     | (0.42, 2.01) |
| 20.37 to < 25.53               | 65  | 50  | 0.73     | (0.42, 1.28) | 23  | 0.94     | (0.46, 1.92) | 27  | 0.64     | (0.33, 1.25) | 1.46     | (0.65, 3.27) |
| ≥25.53                         | 64  | 68  | 0.97     | (0.55, 1.70) | 15  | 0.60     | (0.27, 1.34) | 53  | 1.20     | (0.63, 2.26) | 0.50     | (0.22, 1.16) |
| P-trend†                       |     |     | 0.98     |              |     | 0.39     |              |     | 0.52     |              | 0.19     |              |
| Continuous (log <sub>2</sub> ) | 263 | 255 | 0.96     | (0.72, 1.29) | 105 | 0.98     | (0.70, 1.38) | 150 | 0.96     | (0.69, 1.34) | 1.02     | (0.74, 1.40) |

Free estradiol, pmol/L

|                                |     |     |          |              |     |          |              |     |          |              |          |              |
|--------------------------------|-----|-----|----------|--------------|-----|----------|--------------|-----|----------|--------------|----------|--------------|
| <1.43                          | 67  | 68  | Referent |              | 22  | Referent |              | 46  | Referent |              | Referent |              |
| 1.43 to < 1.74                 | 66  | 72  | 1.01     | (0.60, 1.69) | 30  | 1.36     | (0.66, 2.80) | 42  | 0.85     | (0.47, 1.52) | 1.61     | (0.75, 3.44) |
| 1.74 to < 2.23                 | 64  | 71  | 0.97     | (0.57, 1.64) | 25  | 1.02     | (0.48, 2.18) | 46  | 0.94     | (0.52, 1.68) | 1.09     | (0.50, 2.40) |
| ≥2.23                          | 65  | 47  | 0.69     | (0.38, 1.25) | 28  | 1.30     | (0.59, 2.87) | 19  | 0.42     | (0.21, 0.86) | 3.08     | (1.27, 7.45) |
| P-trend†                       |     |     |          | 0.23         |     |          | 0.69         |     |          | 0.04         |          | 0.04         |
| Continuous (log <sub>2</sub> ) | 262 | 258 | 0.79     | (0.53, 1.17) | 105 | 1.03     | (0.60, 1.78) | 153 | 0.66     | (0.42, 1.03) | 1.58     | (0.88, 2.81) |

\*Unconditional logistic regression models were adjusted for age (continuous), race/ethnicity (white, other), study year of blood draw (continuous), parent study (PLCO, ATBC, CPSII), education (less than high school, high school/GED, some college/technical, college graduate), smoking status (never, current, former), number of cigarettes per day (continuous), body mass index (BMI, 18.5–25.0, 25.0–29.9, ≥30.0 kg/m<sup>2</sup>), and diabetes (yes, no). EA: esophageal adenocarcinoma; GCA: gastric cardia adenocarcinoma; OR: odds ratio; CI: confidence interval; DHEA: dehydroepiandrosterone; DHT: dihydrotestosterone; SHBG: sex hormone binding globulin.

†Tests of linear trend were performed based on the quartile-specific medians of the hormone concentrations. All p-values are from two-sided statistical tests.
